# Supplementary figures and images for: Mechanistic Study of Shixiang Plaster in DFUs Treatment: Network Pharmacology, Animal Experimentation, and LC-MS Analysis
Source: Research Square preprint supplement (doi:10.21203/rs.3.rs-6652265/v1), 2025-09-14

ACTIN

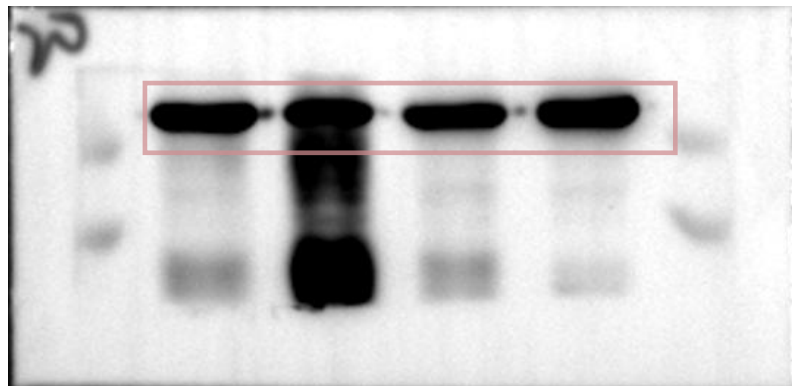

p-p44/42

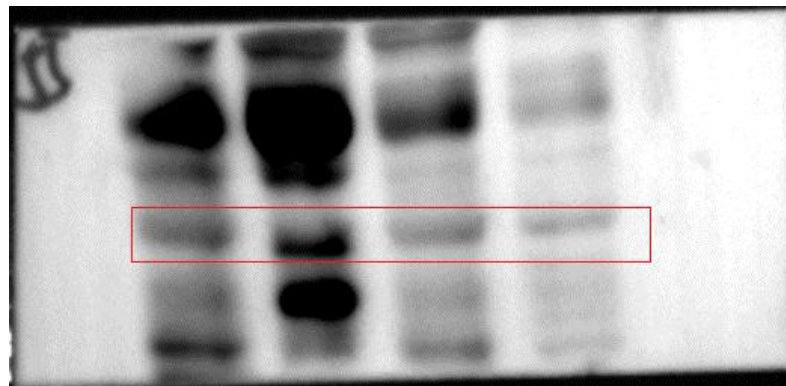

p44/42

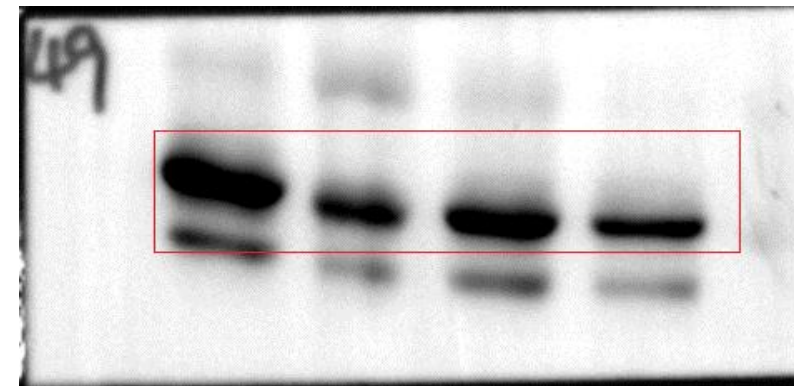

MAPK8

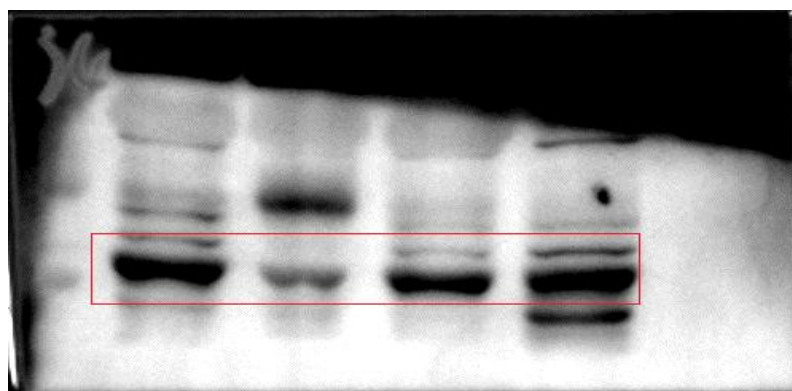

p-p38

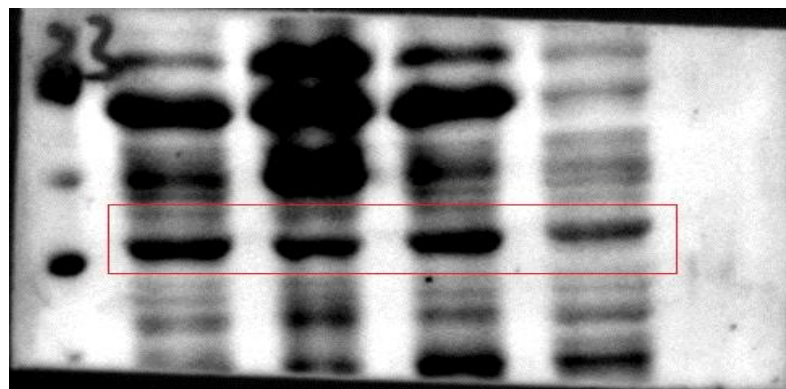

p38

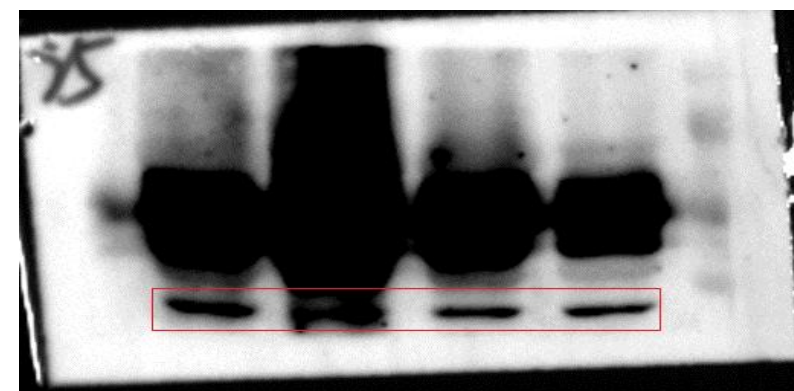

Supplement: Supplementary file 1 [file ec997ab51642381243782754.pdf]
